# Supplementary material
Source: Springer Nature journal article supplement (https://www.springermedizin.de/resource/supplementary/13058_2013_3451_MOESM6_ESM.pdf/9704056)

# A EP

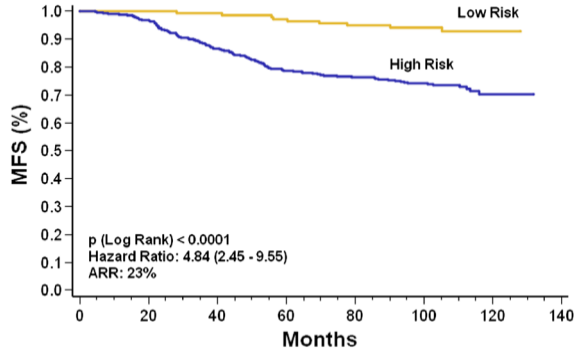

| No. at Risk | 0   | 20  | 40  | 60  | 80  | 100 | 120 | 140 |
|-------------|-----|-----|-----|-----|-----|-----|-----|-----|
| Low         | 141 | 141 | 139 | 133 | 125 | 102 | 21  | 0   |
| High        | 414 | 397 | 350 | 317 | 293 | 233 | 38  | 0   |

# B EPclin

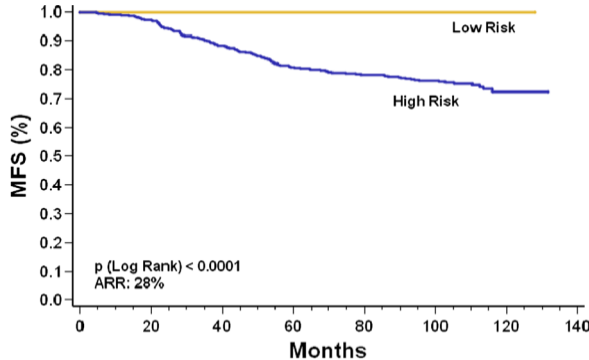

| No. at Risk | 0   | 20  | 40  | 60  | 80  | 100 | 120 | 140 |
|-------------|-----|-----|-----|-----|-----|-----|-----|-----|
| Low         | 74  | 74  | 74  | 72  | 68  | 59  | 16  | 0   |
| High        | 481 | 464 | 415 | 378 | 350 | 276 | 43  | 0   |

Supplement: MOESM6 [file 9704056]
